# Supplementary material for: Vinyl silane-functionalized rice husk ash-reinforced unsaturated polyester nanocomposites
Source: Royal Society of Chemistry journal article supplement (doi:10.1039/c4ra01125b), 2014-01-01
Supplement: c4ra01125b1.pdf [file c4ra01125b1.pdf]

## Vinyl silane functionalized rice husk ash reinforced unsaturated polyester nanocomposites.

**K.Kanimozhi,<sup>a,b</sup> P.Prabunathan,<sup>a</sup> V.Selvaraj,<sup>b</sup> and M.Alagar\*<sup>a</sup>**

<sup>a</sup> Polymer Composite Lab, Department of Chemical Engineering, Anna University, Chennai, 600 025, India.

\*E-mail: mkalagar@yahoo.com; Fax: +91 4422359164; Tel: +91 4422359164

<sup>b</sup> Department of Chemistry, University College of Engineering Villupuram, Anna University, Kakuppam, Villupuram 605 103

### Supporting Information:

The raw rice husk as obtains contains elements such as silica, carbon, potassium, calcium, Magnesium, Aluminium, Iron, Chlorine, Phosphorous, etc., Figure S1a. However, treating with burning, washing, calcinations and again leaching with acid results the purest form of silica as illustrated in the Figure S1b. The respective composition of the elements of the raw rice husk and the treated rice husk ash are listed in the Table S2.

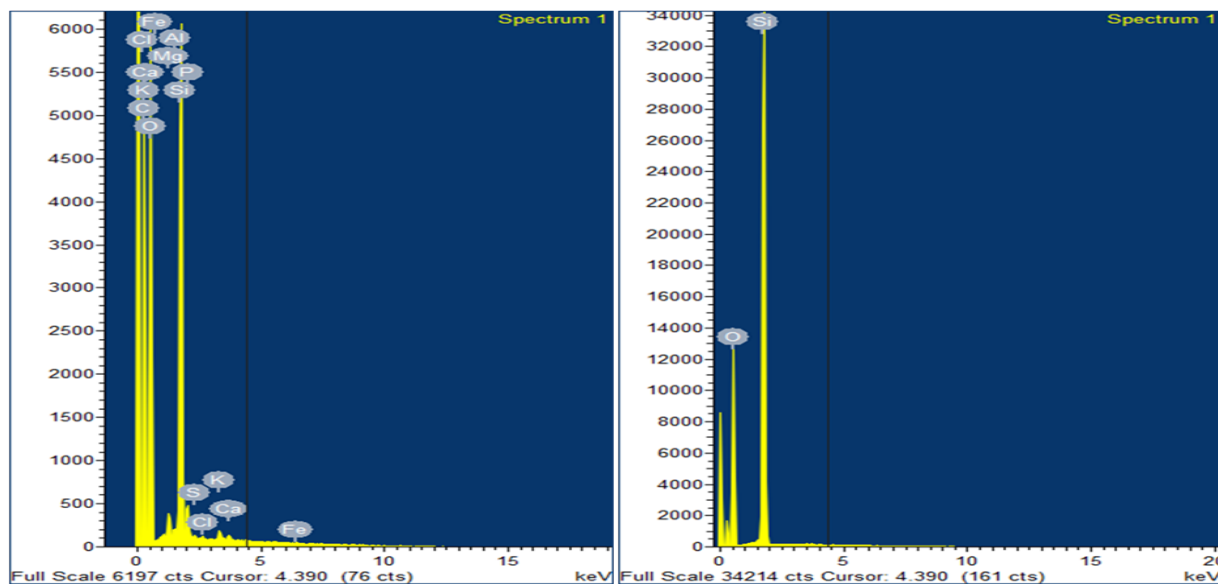

**Table S2**

| <b>Raw Rice husk<br/>(Before treatment)</b> |        | <b>Rice husk ash<br/>(After treatment)</b> |        |
|---------------------------------------------|--------|--------------------------------------------|--------|
| Elements                                    | Wt (%) | Elements                                   | Wt (%) |
| C                                           | 46.85  | Si                                         | 41.89  |
| O                                           | 45.04  | O                                          | 58.11  |
| Mg                                          | 0.35   |                                            |        |
| Al                                          | 0.05   |                                            |        |
| Si                                          | 6.67   |                                            |        |
| P                                           | 0.58   |                                            |        |
| S                                           | 0.06   |                                            |        |
| Cl                                          | 0.04   |                                            |        |
| K                                           | 0.19   |                                            |        |
| Ca                                          | 0.11   |                                            |        |
| Fe                                          | 0.04   |                                            |        |
